# Supplementary material for: Whole-Genome Sequencing of Mycobacterium tuberculosis Provides Insight into the Evolution and Genetic Composition of Drug-Resistant Tuberculosis in Belarus
Source: PubMed Central journal article supplement (PMC5277515; doi:10.1128/jcm.02116-16), 2017-01-25
Supplement: JCM.02116-16_zjm999095347s1.pdf [file JCM.02116-16_zjm999095347s1.pdf]

Supplementary Table 1. Known resistance-conferring mutations. This list is based on current diagnostics and high confidence mutations from the literature as adapted from and described in Desjardins et al. (2016). Mutations with any non-match to the wild type probe in the Hain MTBDR*plus* or MTBDR*sl* were considered to confer resistance. *M. tuberculosis* codon numbering was utilized for all polymorphisms, including for polymorphisms within *rpoB*.

| <b>Drug</b>  | <b>Mutations</b>                                                                                                                           |
|--------------|--------------------------------------------------------------------------------------------------------------------------------------------|
| Rifampicin   | Any nonsynonymous mutation in the <i>rpoB</i> RRDR (430-562), inclusive of mutations on Hain MTBDR <i>plus</i> and GeneXpert               |
| Isoniazid    | <i>katG</i> S315<br><i>inhA</i> promoter                                                                                                   |
| Pyrazinamide | <i>pncA</i> promoter<br><i>pncA</i> loss of function                                                                                       |
| Ethambutol   | <i>embB</i> M306<br><i>embB</i> G406<br><i>embB</i> Q497                                                                                   |
| Streptomycin | <i>rrs</i> 513<br><i>rrs</i> 516<br><i>rrs</i> 906<br><i>rrs</i> 907<br><i>rpsL</i> K43<br><i>rpsL</i> K88<br><i>gidB</i> loss-of-function |
| Ofloxacin    | <i>gyrA</i> G88<br><i>gyrA</i> A90<br><i>gyrA</i> S91<br><i>gyrA</i> D94<br><i>gyrB</i> QRDR (461-499)                                     |
| Kanamycin    | <i>rrs</i> 1400<br><i>rrs</i> 1401<br><i>rrs</i> 1483<br><i>eis</i> promoter                                                               |
| Capreomycin  | <i>rrs</i> 1400<br><i>rrs</i> 1401                                                                                                         |

|             |                                                      |
|-------------|------------------------------------------------------|
|             | <i>rrs</i> 1483<br><i>tlyA</i> loss of function      |
| Ethionamide | <i>inhA</i> promoter<br><i>ethA</i> loss of function |
| Cycloserine | <i>ald</i> loss of function                          |

## References

**Desjardins CA, Cohen KA, Munsamy V, Abeel T, Maharaj K, Walker BJ, Shea TP, Almeida DV, Manson AL, Salazar A, Padayatchi N, O'Donnell MR, Mlisana KP, Wortman J, Birren BW, Grosset J, Earl AM, Pym AS.** 2016. Genomic and functional analyses of *Mycobacterium tuberculosis* strains implicate *ald* in D-cycloserine resistance. *Nat Genet* **48**:544-551.
